# Supplementary figures and images for: Molecular Characterization and Expression Analysis of the Gene Encoding 3-Hydroxyacyl-CoA Dehydrogenase (EGR-03347) from Echinococcus Granulosus and the Evaluation of the Immune Protection of the Definitive Hosts (dogs)
Source: Research Square preprint supplement (doi:10.21203/rs.3.rs-579772/v1), 2021-06-08

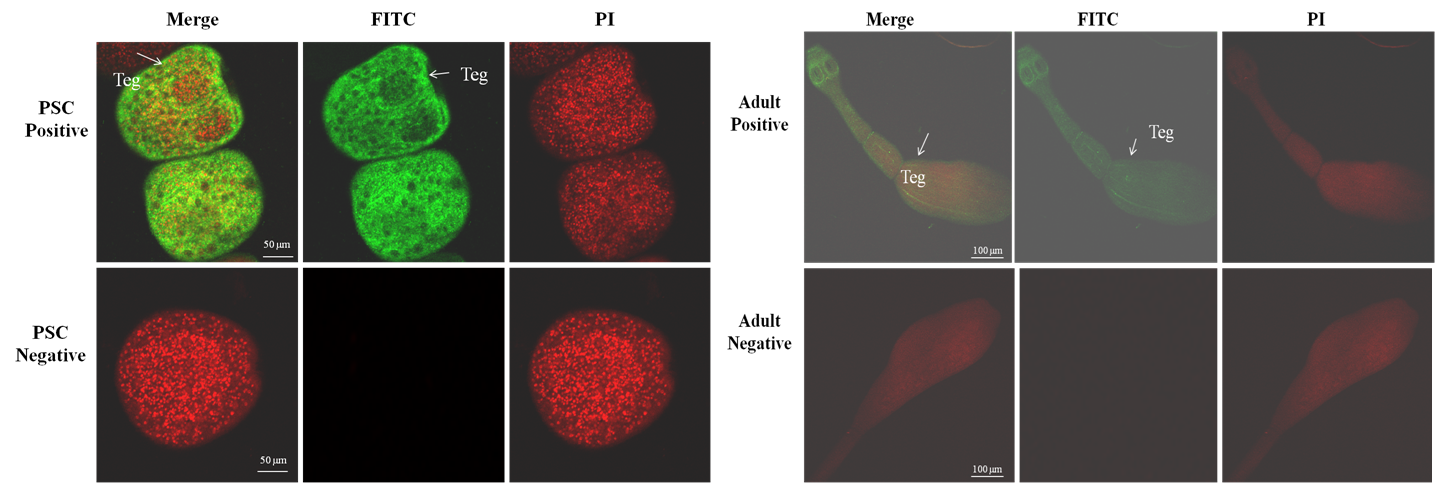

Supplement: Supplementary file 1 [file ee6b7b52951943147ddc6f27.docx]
